# Supplementary material for: Transcriptome Profiling of the Murine Testis during the First Wave of Spermatogenesis
Source: PLoS One. 2013 Apr 17;8(4):e61558. doi: 10.1371/journal.pone.0061558 (PMC3629203; doi:10.1371/journal.pone.0061558)
Supplement: Table S2 — Upregulated genes in comparison of PND14 and 17. (XLSX) [file pone.0061558.s006.xlsx]

## Sheet: Taul1
PND17 RPKM	PND14 RPKM	SD PND17	SD PND14	FC	logFC	p-value	Symbol	Description
32	3	7	1	13.85	3.792	3.04223e-08	SNORA30	Small nucleolar RNA SNORA30/SNORA37 family
17	7	6	2	3.794	1.924	1.53923e-07	Aqp8	aquaporin 8
23	13	4	7	3.215	1.685	2.11302e-07	Prss45	protease, serine, 45
23	12	7	7	2.468	1.303	3.90225e-07	Gm13942	predicted gene 13942
76	36	39	24	2.458	1.298	3.94457e-07	1700011E24Rik	RIKEN cDNA 1700011E24 gene
41	19	20	10	2.22	1.15	5.25841e-07	Pbp2	phosphatidylethanolamine binding protein 2
19	8	9	3	2.19	1.131	5.47502e-07	Slc9a10	solute carrier family 9, member 10
267	136	106	62	2.082	1.058	6.42648e-07	Spata4	spermatogenesis associated 4
88	49	31	23	2.015	1.011	7.16164e-07	Fbp1	fructose bisphosphatase 1
873	550	48	430	3.417	1.773	3.35473e-05	Snord99	small nucleolar RNA, C/D box 99
1046	855	58	586	2.28	1.189	1.57124e-05	Snord49b	small nucleolar RNA, C/D box 49B
139	51	15	12	3.53	1.82	4.13686e-05	snoU54	Small nucleolar RNA U54
3086	1851	890	1891	4.784	2.258	4.9041e-05	snoU6-77	Small nucleolar RNA U6-77
6930	3312	2131	3119	4.904	2.294	5.77527e-05	Snord37	small nucleolar RNA, C/D box 37
12	2	14	0	11.12	3.475	0.000165421	Gm10260	predicted gene 10260
2589	1651	885	1913	6.585	2.719	0.000210798	U5	U5 spliceosomal RNA
2571	1822	537	1679	3.449	1.786	0.000230199	SNORD58	Small nucleolar RNA SNORD58
4341	2915	253	2421	3.459	1.79	0.000297871	SNORD73	Small nucleolar RNA SNORD73
583	386	37	300	3.518	1.815	0.000332267	SCARNA16	Small Cajal body specific RNA 16
2078	1321	323	993	2.989	1.579	0.000337991	SNORA54	Small nucleolar RNA SNORA54
11202	8920	897	6894	2.612	1.385	0.000277491	SNORD26	Small nucleolar RNA SNORD26
2642	1631	330	1096	2.813	1.492	0.000359719	Snora7a	small nucleolar RNA, H/ACA box 7A
1922	1588	524	1416	2.644	1.403	0.000360226	Snord42b	small nucleolar RNA, C/D box 42B
345	237	43	182	2.899	1.535	0.000432347	1500012F01Rik	RIKEN cDNA 1500012F01 gene
140	96	6	66	2.925	1.548	0.000493576	2810008D09Rik	RIKEN cDNA 2810008D09 gene
1942	1372	132	1260	3.846	1.943	0.00077108	mt-Tl1	mitochondrially encoded tRNA leucine 1
3685	2512	320	2341	4.041	2.015	0.00089903	SNORD12	Small nucleolar SNORD12/SNORD106
1943	1286	604	1061	2.83	1.501	0.000602266	Snora28	small nucleolar RNA, H/ACA box 28
5867	3775	548	3138	3.522	1.816	0.000870181	Snord12	small nucleolar RNA, C/D box 12
5880	4711	1359	3256	2.042	1.03	0.000250017	Snord33	small nucleolar RNA, C/D box 33
486	364	35	190	2.221	1.151	0.000388835	Snora73a	small nucleolar RNA, H/ACA box 73a
26465	19363	1508	11042	2.198	1.136	0.000347425	SNORD75	Small nucleolar RNA SNORD75
9430	7072	7950	7659	2.3	1.202	0.000435598	U5	U5 spliceosomal RNA
114	70	60	56	2.33	1.22	0.000484257	mt-Ts2	mitochondrially encoded tRNA serine 2
887	527	307	450	3.201	1.678	0.000911935	U2	U2 spliceosomal RNA
5672	3426	628	3253	4.644	2.215	0.00118097	SNORD11	Small nucleolar RNA SNORD11
1814	1175	124	736	2.639	1.4	0.000911976	Snora74a	small nucleolar RNA, H/ACA box 74A
7737	5014	2478	5192	4.459	2.157	0.00148303	SNORD27	Small nucleolar RNA SNORD27
621	248	225	237	5.733	2.519	0.00176573	U4	U4 spliceosomal RNA
1000	658	150	457	2.668	1.416	0.00104805	SNORA63	Small nucleolar RNA SNORA63
133	62	10	25	2.846	1.509	0.00131163	U1	U1 spliceosomal RNA
111	94	26	82	2.559	1.356	0.00103775	Rpl23a	ribosomal protein L23A
1360	748	340	586	3.358	1.748	0.00164337	Snord17	small nucleolar RNA, C/D box 17
16472	10646	1769	8202	3.141	1.651	0.00149912	SNORD46	Small nucleolar RNA SNORD46
1101	738	153	603	3.193	1.675	0.00162873	Snora21	small nucleolar RNA, H/ACA box 21
3333	1894	667	1355	3.056	1.612	0.00175946	SNORD25	Small nucleolar RNA SNORD25
134	89	44	78	3.067	1.617	0.00179989	SNORA66	Small nucleolar RNA SNORA66
1064	695	126	537	3.091	1.628	0.00196015	Rps8	ribosomal protein S8
502	262	192	196	2.96	1.566	0.00191238	SNORA72	Small nucleolar RNA SNORA72
552	421	45	350	2.995	1.582	0.00204278	Snora70	small nucleolar RNA, H/ACA box 70
1721	1096	178	1075	4.751	2.248	0.00281848	Snord72	small nucleolar RNA, C/D box 72
1159	970	372	890	2.632	1.396	0.00177936	Snord4a	small nucleolar RNA, C/D box 4A
1412	970	110	809	3.355	1.746	0.00232618	SNORD29	Small nucleolar RNA SNORD29
88	53	24	31	2.287	1.194	0.00172377	2700023E23Rik	RIKEN cDNA 2700023E23 gene
17600	12388	4485	11151	3.204	1.68	0.00301044	Y_RNA	Y RNA
355	233	249	278	4.931	2.302	0.00370537	B930036N10Rik	RIKEN cDNA B930036N10 gene
1624	947	476	612	2.506	1.326	0.00225632	AC115823.1
1027	515	24	517	6.764	2.758	0.00401286	Snora17	small nucleolar RNA, H/ACA box 17
171	97	10	103	6.886	2.784	0.00409561	SNORA17	Small nucleolar RNA SNORA17
1034	887	100	724	2.567	1.36	0.00271849	CT010429.3
841	769	167	599	2.088	1.062	0.00140644	Snord15a	small nucleolar RNA, C/D box 15A
470	273	96	189	2.883	1.527	0.0034268	SNORA84	Small nucleolar RNA SNORA84
4005	2611	2819	3157	5.322	2.412	0.00440621	U5	U5 spliceosomal RNA
5627	4006	1599	3173	2.55	1.351	0.00295158	Snord104	small nucleolar RNA, C/D box 104
1398	853	271	742	3.673	1.877	0.00396145	SNORD38	Small nucleolar RNA SNORD38
2087	1293	840	1218	3.459	1.79	0.00400685	SNORD127	Small nucleolar RNA SNORD127
805	498	216	312	2.353	1.235	0.00279928	Snora31	small nucleolar RNA, H/ACA box 31
12970	10968	1375	7596	2.143	1.1	0.00223491	U4atac	U4atac minor spliceosomal RNA
519	323	48	184	2.509	1.327	0.00406088	Scarna3a	small Cajal body-specific RNA 3A
714	499	243	489	3.534	1.821	0.00612883	SNORD30	Small nucleolar RNA SNORD30
4757	3863	1102	3127	2.408	1.268	0.00402548	Snord61	small nucleolar RNA, C/D box 61
53	24	14	22	7.541	2.915	0.00710979	U1	U1 spliceosomal RNA
32	20	10	4	2.181	1.125	0.00349769	Vcam1	vascular cell adhesion molecule 1
92	54	20	45	3.453	1.788	0.00621435	U12	U12 minor spliceosomal RNA
1771	1136	334	601	2.16	1.111	0.00342417	SNORA67	Small nucleolar RNA SNORA67
133	89	40	79	3.143	1.652	0.00611942	Snora34	small nucleolar RNA, H/ACA box 34
874	646	181	693	4.788	2.26	0.00720059	U4	U4 spliceosomal RNA
1039	873	113	689	2.488	1.315	0.00493247	Snord83b	small nucleolar RNA, C/D box 83B
878	557	38	316	2.713	1.44	0.00561113	U2	U2 spliceosomal RNA
288	203	66	142	2.359	1.238	0.00464007	SNORA35	Small nucleolar RNA SNORA35
62	37	4	28	3.397	1.764	0.00734894	Snhg7	small nucleolar RNA host gene (non-protein coding) 7
5782	3328	1616	3023	3.897	1.962	0.00821027	mt-Tm	mitochondrially encoded tRNA methionine
876	557	145	375	2.65	1.406	0.00672788	SNORD94	Small Nucleolar RNA SNORD94
1171	705	155	534	3.242	1.697	0.00762572	Snord42a	small nucleolar RNA, C/D box 42A
1800	1079	415	702	2.585	1.37	0.0067296	U3	Small nucleolar RNA U3
85	48	26	22	2.072	1.051	0.00397344	1700003M02Rik	RIKEN cDNA 1700003M02 gene
161	114	26	66	2.125	1.087	0.00435123	Snhg12	small nucleolar RNA host gene 12
3841	3398	484	2374	2.035	1.025	0.003826	SNORD45	Small nucleolar RNA SNORD45
202	102	48	100	5.374	2.426	0.00947199	SNORD111	Small Nucleolar RNA SNORD111
5995	4264	1786	4496	4.363	2.125	0.00946146	U4	U4 spliceosomal RNA
121	89	3	44	2.133	1.093	0.00538237	Snhg3	small nucleolar RNA host gene (non-protein coding) 3
427	264	120	217	3.085	1.625	0.0091877	Snord88c	small nucleolar RNA, C/D box 88C
4465	3147	562	1793	2.165	1.114	0.00607888	Snord49a	small nucleolar RNA, C/D box 49A
297	170	51	115	2.93	1.551	0.00923824	snoU109	Small nucleolar RNA U109
679	394	75	238	2.772	1.471	0.00885088	SNORA49	Small nucleolar RNA SNORA49
3023	2144	1195	1844	2.593	1.374	0.00939258	Snord96a	small nucleolar RNA, C/D box 96A
1121	726	348	433	2.085	1.06	0.00739831	U6atac	U6atac minor spliceosomal RNA
83	67	9	42	2.063	1.045	0.00734284	SNORA74	Small nucleolar RNA SNORA74
6022	5228	1696	4249	2.169	1.117	0.00859876	SNORD41	Small nucleolar RNA SNORD41
3238	2360	872	1503	2.021	1.015	0.00917647	SNORD79	Small nucleolar RNA SNORD79
